# Supplementary material
Source: PubMed Central journal article supplement (PMC6355093)
Supplement: fj.201801149R.sf1.pdf [file fj.201801149R.sf1.pdf]

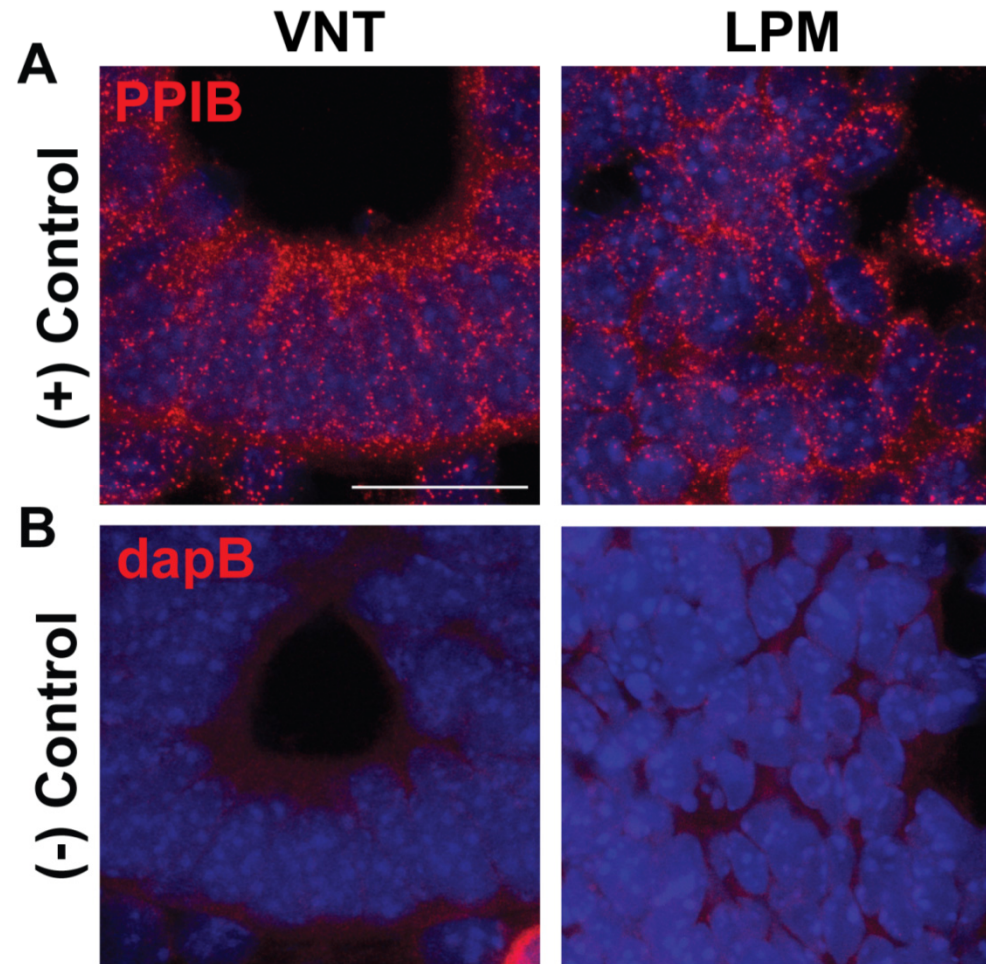

### Supplemental Figure 1

*In situ* hybridization control probes on embryos ventral neural tubes (VNT) and lateral plate mesenchyme (LPM) at E10.5 *A*). Positive control (+ Control) probes for housekeeping genes peptidylprolyl isomerase B (PPIB, red) and RNA Pol II subunit A (POLR2A, green) show staining throughout the sample. *B*) Negative control (- Control) probes for the non-mammalian gene Dihydrodipicolinate reductase (dapB, red and green) show no staining. Scale bar 20µm. DAPI stained nuclei are blue.
