# Supplementary material
Source: PubMed Central journal article supplement (PMC6355093)
Supplement: fj.201801149R.sf2.pdf [file fj.201801149R.sf2.pdf]

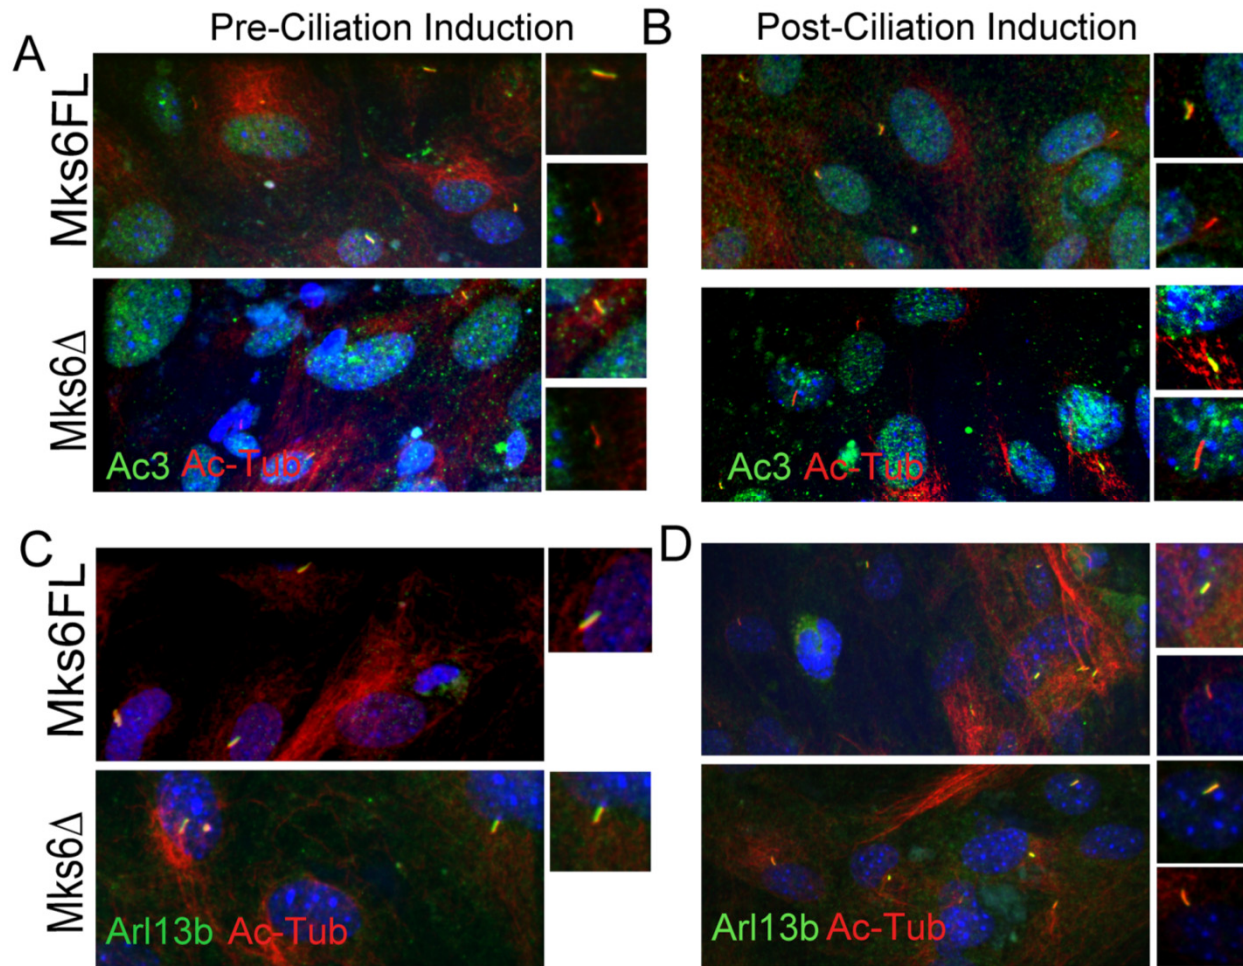

**Supplemental Figure 2**

Immunofluorescence microscopy analysis of renal epithelial cells isolated from CAGCreER;*Mks6<sup>FL</sup>* mice. Cre activity was induced to delete *Mks6* (*Mks6<sup>Δ</sup>*) and cells were stained with A) ACIII (green) and Acetylated  $\alpha$ -tubulin antibodies (red) or B) Arl13B (green) and Acetylated  $\alpha$ -tubulin antibodies (red). Nuclei (blue) are stained using Hoechst. Panels at right highlight cilia with different protein composition.
